# Supplementary material for: Mesenchymal stem cell-loaded thermosensitive hydroxypropyl chitin hydrogel combined with a three-dimensional-printed poly(ε-caprolactone) /nano-hydroxyapatite scaffold to repair bone defects via osteogenesis, angiogenesis and immunomodulation
Source: PubMed Central journal article supplement (PMC6929983; doi:10.7150/thno.39167), 2020-01-01
Supplement: thnov10p0725s1.pdf [file thnov10p0725s1.pdf]

Supporting information

# **Mesenchymal stem cell-loaded thermosensitive hydroxypropyl chitin hydrogel combined with a three-dimensional-printed poly( $\epsilon$ -caprolactone) /nano-hydroxyapatite scaffold to repair bone defects via osteogenesis, angiogenesis and immunomodulation**

*Xiongfa Ji<sup>1,2\*</sup>, Yuan Xi<sup>2\*</sup>, Limin Ma<sup>1\*</sup>, Bo Bi<sup>3</sup>, Hao Zhu<sup>2</sup>, Zehua lei<sup>2</sup>, Wenbin*

*Liu<sup>2</sup>, HongXu Pu<sup>2</sup>, Jiawei Jiang<sup>2</sup>, Xulin Jiang<sup>3</sup>✉, Yu Zhang<sup>1</sup>✉, Jun Xiao<sup>2</sup>✉*

1. Department of Orthopedics, Guangdong General Hospital, Guangdong Academy of Medical Sciences, Guangzhou, Guangdong 510080, PR China

2. Department of Orthopaedic Surgery, Tongji Hospital, Tongji Medical College, Huazhong University of Science and Technology, Wuhan, 430030, China

3. Key Laboratory of Biomedical Polymers of Ministry of Education & Department of Chemistry, Wuhan University, Wuhan, 430072, China.

\*These authors contributed equally to this work.

✉ Xulin Jiang, Yu Zhang and Jun Xiao are the co-corresponding authors.

**Table S1.** Primers used in Real-Time PCR for RAW 264.7.

| <b>Gene</b>                    | <b>Forward primer sequence(5'-3')</b> | <b>Reverse primer sequence(5'-3')</b> |
|--------------------------------|---------------------------------------|---------------------------------------|
| <b>GADPH</b>                   | TTCCAGGAGCGAGACCCCACTA                | GGGCGGAGATGATGACCCTTTT                |
| <b>BMP2</b>                    | GGGACCCGCTGTCTTCTAGT                  | TCAACTCAAATTCGCTGAGGAC                |
| <b>TGF <math>\beta</math>1</b> | CCACCTGCAAGACCATCGAC                  | CTGGCGAGCCTTAGTTTGGAC                 |
| <b>Ptges</b>                   | GGATGCGCTGAAACGTGGA                   | CAGGAATGAGTACACGAAGCC                 |
| <b>VEGF<math>\alpha</math></b> | TATTCAGCGGACTCACCAGC                  | AACCAACCTCCTCAAACCGT                  |
| <b>PDGFB</b>                   | CATCCGCTCCTTTGATGATCTT                | GTGCTCGGGTCATGTTCAAGT                 |
| <b>MMP9</b>                    | GCAGAGGCATACTTGTACCG                  | TGATGTTATGATGGTCCCCTTG                |
| <b>IL1<math>\beta</math></b>   | CCCAACTGGTACATCAGCACCTC               | GACACGGATTCCATGGTGAAGTC               |
| <b>TNF-<math>\alpha</math></b> | GGACTAGCCAGGAGGGAGAA                  | CGCGGATCATGCTTTCTGTG                  |
| <b>IL6</b>                     | CTGCAAGAGACTTCCATCCAG                 | AGTGGTATAGACAGGTCTGTTGG               |
| <b>Arg-1</b>                   | CTCCAAGCCAAAGTCCTTAGAG                | GGAGCTGTCATTAGGGACATCA                |
| <b>IL10</b>                    | GCTCTTACTGACTGGCATGAG                 | CGCAGCTCTAGGAGCATGTG                  |
| <b>CCL22</b>                   | CTCTGCCATCACGTTTAGTGAA                | GACGGTTATCAAAAACAACGCC                |

**Table S2.** Primers used in Real-Time PCR for MSCs.

| <b>Gene</b>   | <b>Forward primer sequence(5'-3')</b> | <b>Reverse primer sequence(5'-3')</b> |
|---------------|---------------------------------------|---------------------------------------|
| <b>GADPH</b>  | GGTGGACCTCATGGCCTACA                  | CTCTCTTGCTCTCAGTATCCTTGCT             |
| <b>OCN</b>    | GCCCTGACTGCATTCTGCCTCT                | TCACCACCTTACTGCCCTCCTG                |
| <b>OPN</b>    | CCAGCCAAGGACCAACTACA                  | GCTGGCAGTGAAGGACTCAT                  |
| <b>ALP</b>    | GCACAACATCAAGGACATCG                  | TCAGTTCTGTTCTTGGGGTACAT               |
| <b>Runx 1</b> | TGCGTATCCCCGTAGATGCC                  | GTGGTCAGCTAGTACCTCCAC                 |
| <b>Runx 2</b> | GGGACCGACACAGCCATATA                  | TCTTAGGGTCTCGGAGGGAA                  |
| <b>Runx 3</b> | TGTAACACCAAGCACACCCA                  | GTTCAGGTCTGAGGAGCCTTG                 |
| <b>COL I</b>  | GGCAGATGGTGGATGGTAAGT                 | CCAGACTCTTCAAACCTCGCT                 |
| <b>COL X</b>  | TGCTGCTAGTGTCTTGACG                   | CCTCTTACTGAAATCTCTTTACCCT             |

**Fig.S1** The SEM characterization of nano-hydroapatite(nHA). Scale bar, 200 $\mu$ m.

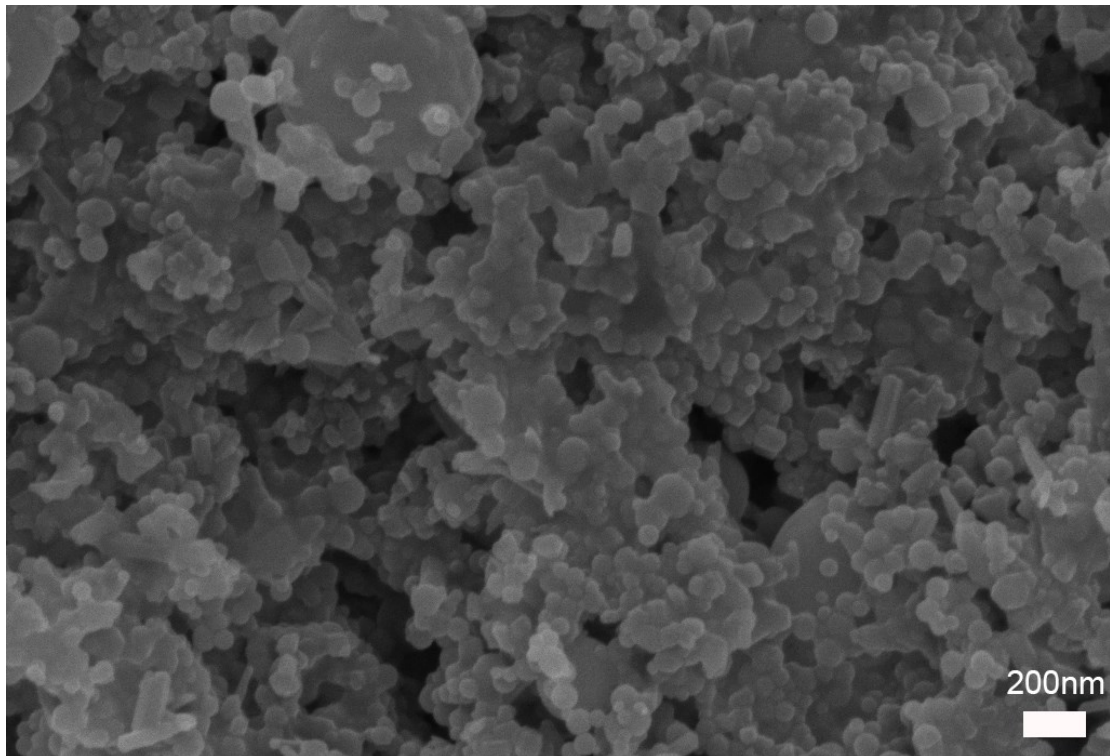

**Fig.S2** The identification of rat endothelial cells using immune-fluorescent staining of CD31. Scale bar, 50 $\mu$ m.

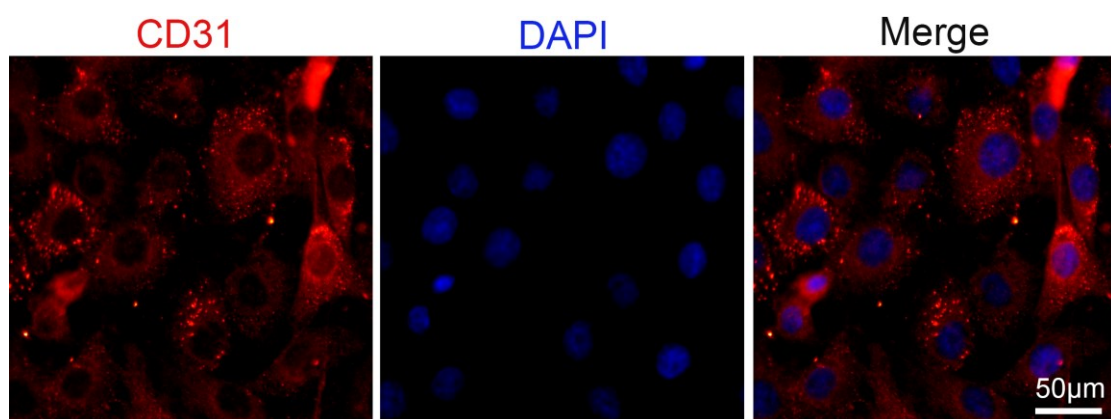

**Fig.S3** MSC spheroids formation in or on HPCH. MSCs encapsulated in (A) HPCH hydrogel and on (B) HPCH hydrogel after 1 day, 4 days and 7 days' culture.

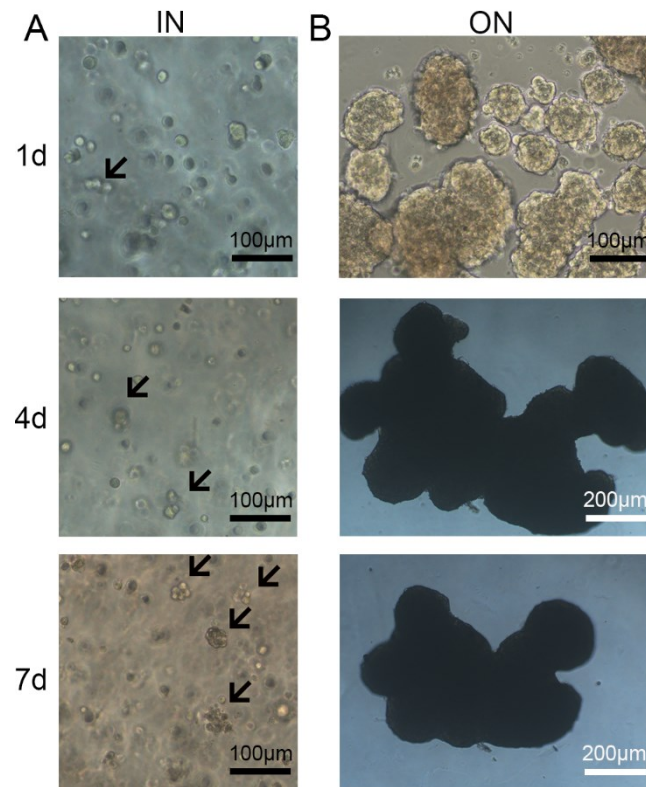

**Fig. S4** Alizarin red staining of MSCs for 14 days' culture. The culture medium was the extract medium from RAW 264.7 cultured with PCL/nHA or HPCH. Scale bar, 1mm.

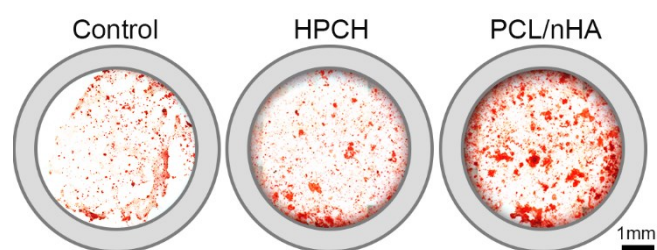

**Fig.S5** Immunofluorescent staining of the subcutaneous injection of MSCs. Scale bar, 100  $\mu\text{m}$ .

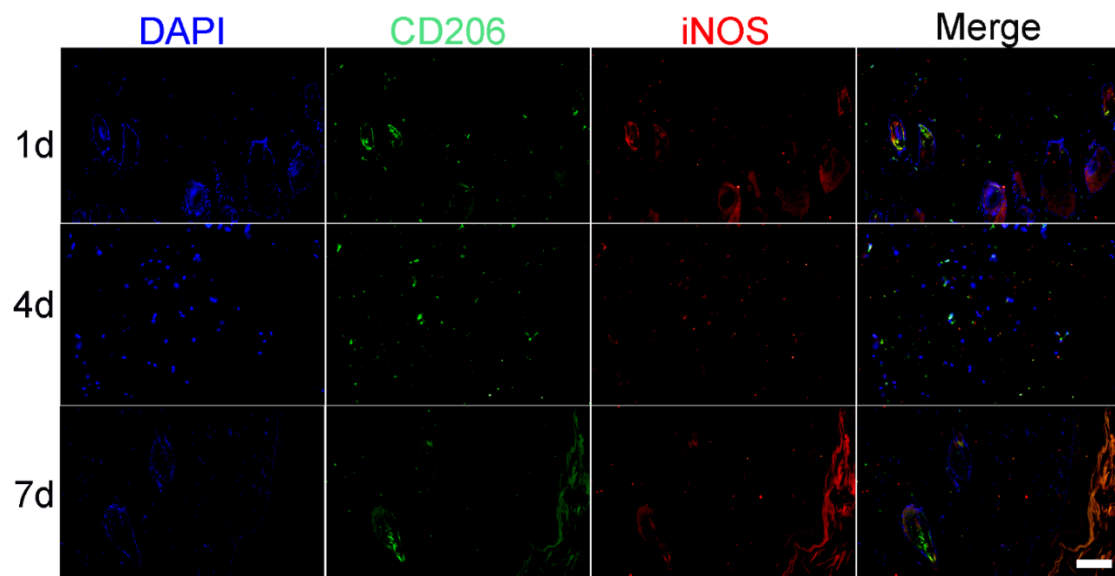

**Fig. S6** H&E staining for the subcutaneous implantation of MSCs and HPCH for 1d, 4d and 7d. Scale bar, 400  $\mu$ m.

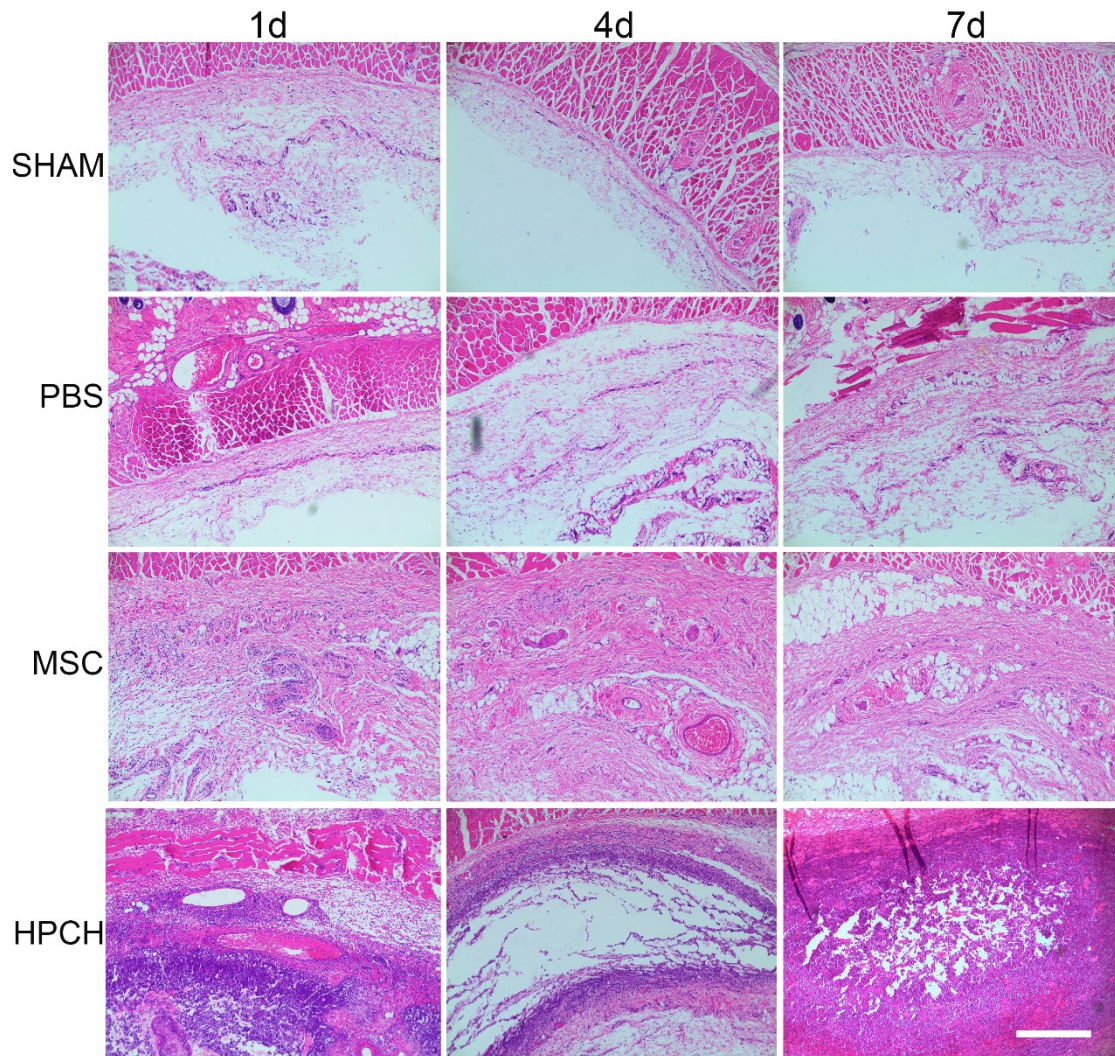

**Fig.S7** New bone formed in the central of the scaffold. Concentrically arranged lamellae of bone matrix and osteocytes lived within lacuna, and marrow cavity was formed in the “osteon”. S, scaffold. Scale bar, 100μm.

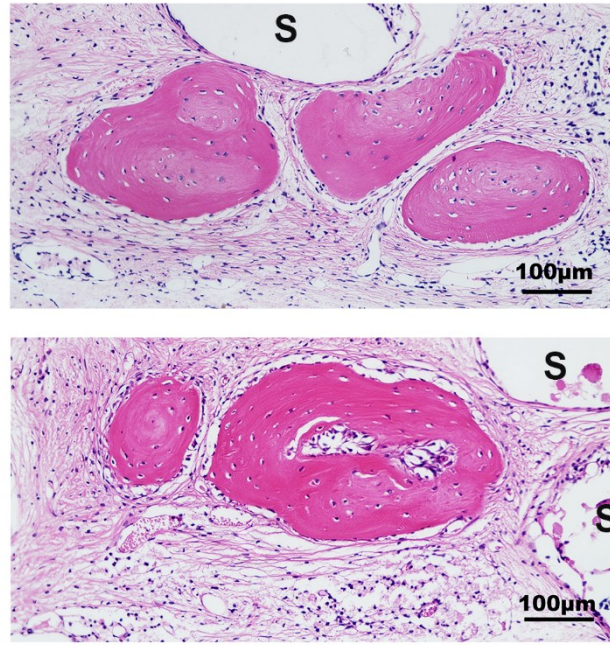

**Video 1.** 3D reconstruction of PCL/nHA based on micro-CT result.
